# Supplementary material for: Ultra-high dispersion of Ni-based OER catalysts on graphene 3D networks enhances the in situ Fe3+ catalytic activation
Source: Royal Society of Chemistry journal article supplement (doi:10.1039/d3ta04481e), 2023-01-01
Supplement: d3ta04481e1.pdf [file d3ta04481e1.pdf]

## Supporting Information

### **Ultra-high dispersion of Ni-based OER catalysts on graphene 3D networks enhances the in-situ Fe<sup>3+</sup> catalytic activation**

María González-Ingelmo,<sup>a</sup> Miriam López García,<sup>a</sup> Freddy E. Oropeza,<sup>b</sup> Patricia Álvarez,<sup>a</sup>  
Clara Blanco,<sup>a</sup> Ricardo Santamaría<sup>a</sup> and Victoria G. Rocha <sup>\*a</sup>

<sup>a</sup> Instituto de Ciencia y Tecnología del Carbono, INCAR-CSIC, Francisco Pintado Fe 26, 33011-  
Oviedo (Spain)

<sup>b</sup> Photoactivated Processes Unit, IMDEA Energy, Avenida Ramón de la Sagra 3, 28935-  
Móstoles, Madrid (Spain)

\*Corresponding author: Victoria G. Rocha (vgarciarocha@incar.csic.es)

## 1. Preparation of Fe-free KOH electrolyte

KOH electrolyte was purified for rigorously Fe-free measurements following a procedure reported by Trotochaud et al.<sup>1</sup> In a 30 mL polypropylene centrifuge tube, 0.8 g of  $\text{Ni}(\text{NO}_3)_2 \cdot 6 \text{H}_2\text{O}$  were dissolved in 1.6 mL of Milli-Q  $\text{H}_2\text{O}$ . 8 mL 1 M KOH were added to form a high-purity  $\text{Ni}(\text{OH})_2$  precipitate. The mixture was shaken and centrifuged at 4000 rpm for 20 min and the supernatant was decanted.  $\text{Ni}(\text{OH})_2$  precipitate was washed up to three times by adding 1.6 mL of 1 M KOH and 8 mL of Milli-Q  $\text{H}_2\text{O}$  followed by shaking, centrifugation and decanting. Once  $\text{Ni}(\text{OH})_2$  was obtained it is used to adsorb Fe impurities present in KOH. Therefore, 20 mL of 1M KOH were added to the solid precipitate and mechanically agitated for at least 10 minutes. The solution was allowed to rest for 3 h. It was then centrifuged at 6000 rpm for 30 minutes. The purified KOH supernatant was collected by filtration through a hydrophilic 0.1 $\mu\text{m}$  polyethersulfone filter<sup>2</sup> into a polypropylene bottle for storage and used as Fe-Free KOH.

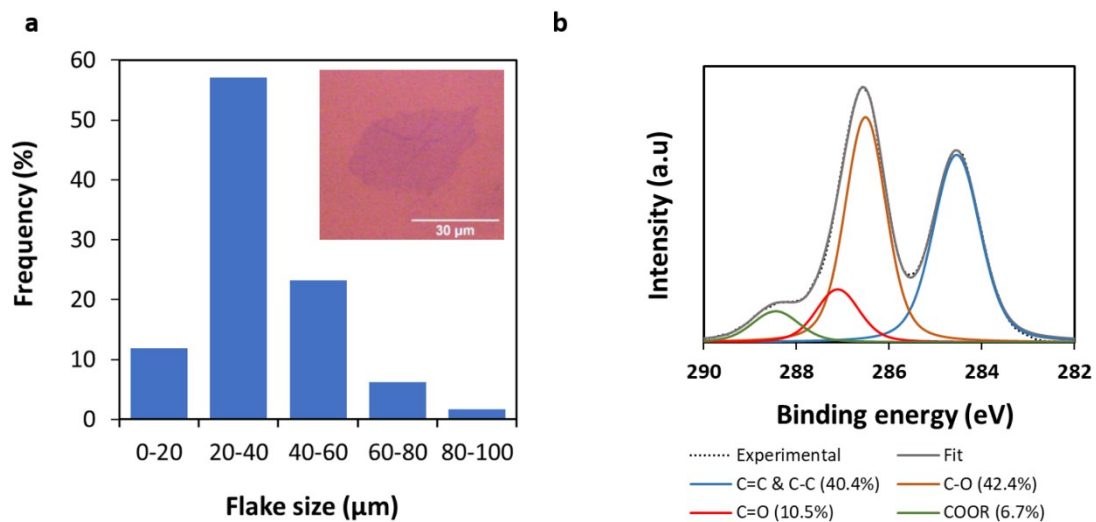

**Figure S1|GO characterization.** Image **a** shows the distribution of flake size and a flake image taken by optical microscopy (inset) while **b** represents the deconvoluted C1s spectra of GO

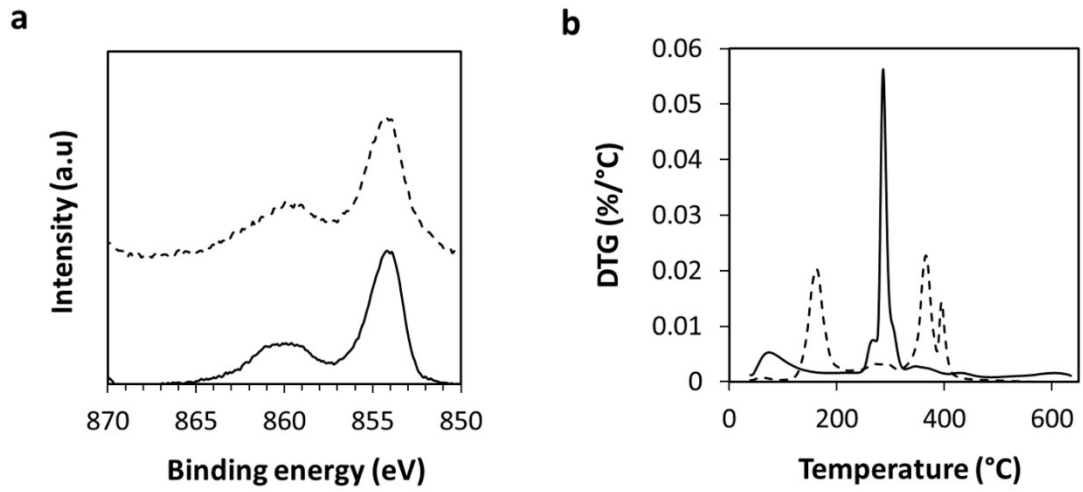

**Figure S2 | NiOH<sub>x</sub> precursors characterization.** a) XPS Ni<sub>2p</sub> spectra and b) weight mass loss curve in air atmosphere up to 650 °C (10°C/min) of the different NiOH<sub>x</sub> precursors: lactate (solid line) and nitrates (dashed line).

**Table S1** | Formulation and Ni concentration of the hybrid's networks determined by ICP-MS of the hybrid materials.

| Source   | Ratio GO/NiOHx | Ni (wt.%) | RSD (%) |
|----------|----------------|-----------|---------|
| Lactates | 20             | 2.5       | 2.0     |
|          | 10             | 4.1       | 3.4     |
|          | 4              | 10.3      | 4.4     |
| Nitrates | 20             | 3.8       | 6.1     |
|          | 10             | 6.9       | 0.3     |

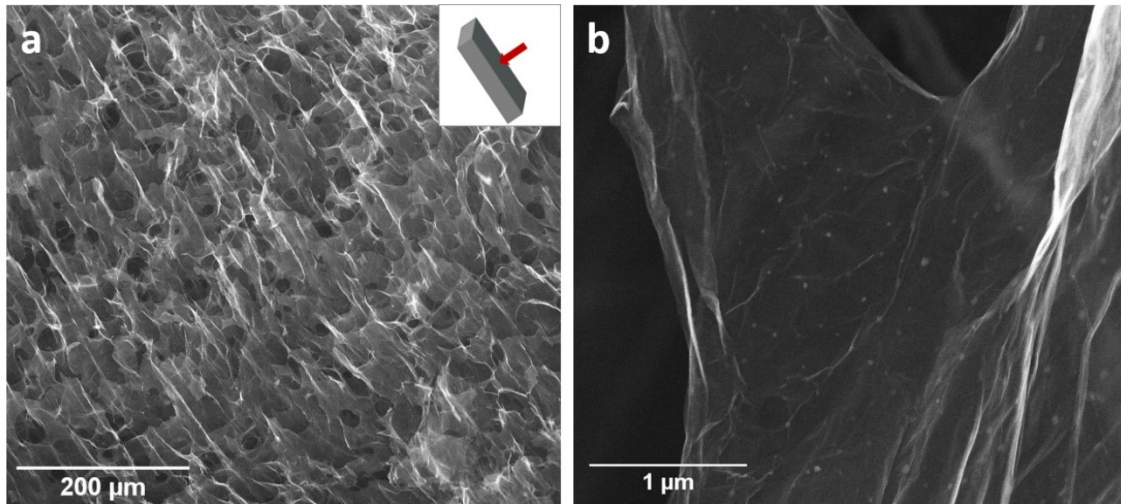

**Figure S3** | SEM images of rGO-6.9-Ni-nitrates. Image **a** was taken in a parallel plane to the direction of ice growth and **b** shows the dispersion of Ni-based particles on the graphene flake at higher magnification

**Table S2** | Selected area electron diffraction (SAED) ring patterns taken from the Ni-doped rGO samples. Diameter measurements of the rings were made using the software ImageJ.

| Sample              | Image                                                                               | Reciprocal of diameter<br>(1/nm) |        |        | Average<br>(1/nm) | Interplanar spacing (Å) |                          |               |
|---------------------|-------------------------------------------------------------------------------------|----------------------------------|--------|--------|-------------------|-------------------------|--------------------------|---------------|
|                     |                                                                                     |                                  |        |        |                   | Calculated              | Theoretical <sup>3</sup> |               |
|                     |                                                                                     |                                  |        |        |                   |                         | Ni                       | NiO           |
| rGO-2.5-Ni-lactates | 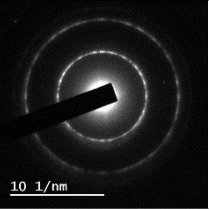   | 9.714                            | 9.640  | 9.694  | 9.683             | <b>2.07</b>             | <b>2.0316</b>            | <b>2.0845</b> |
|                     |                                                                                     | 16.759                           | 16.599 | 16.757 | 16.705            |                         | <b>1.20</b>              | <b>1.2057</b> |
| rGO-4.1-Ni-lactates |    | 9.467                            | 9.483  | 9.464  | 9.471             | <b>2.11</b>             |                          |               |
|                     |                                                                                     | 16.466                           | 16.370 | 16.409 | 16.415            |                         | <b>1.22</b>              |               |
| rGO-3.8-Ni-nitrates |   | 9.816                            | 9.693  | 9.615  | 9.708             | <b>2.06</b>             |                          |               |
|                     |                                                                                     | 16.763                           | 16.733 | 16.857 | 16.784            |                         | <b>1.19</b>              |               |
| rGO-6.9-Ni-nitrates |  | 9.719                            | 9.786  | 9.756  | 9.754             | <b>2.05</b>             |                          |               |
|                     |                                                                                     | 16.972                           | 16.673 | 16.787 | 16.811            |                         | <b>1.19</b>              |               |



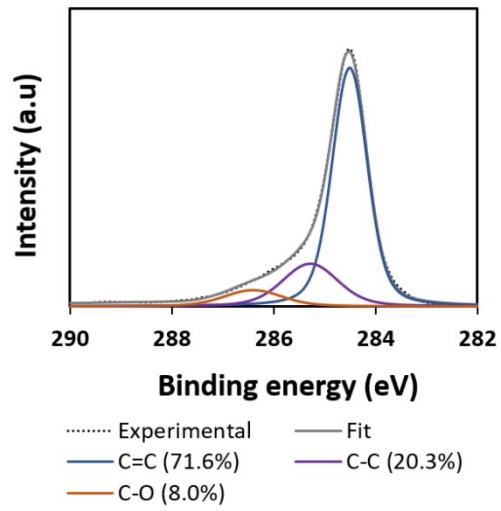

**Figure S4.** C1s spectrum of rGO at 650°C

**Table S3** | Ni/C surface ratio obtained by XPS analysis

| <b>Sample</b>       | <b>Ratio Ni/C (%)</b> |
|---------------------|-----------------------|
| rGO-2.5-Ni-lactates | 0.17                  |
| rGO-4.1-Ni-lactates | 0.20                  |
| rGO-3.8-Ni-nitrates | 0.32                  |
| rGO-6.9-Ni-nitrates | 0.21                  |

**Table S4.** Summary of results related to OER activity for our materials and similar composition materials reported in the literature.

| Material                                                        | Overpotential@<br>XmA/cm <sup>2</sup> (mV) | Electrode mass loading<br>(mg/cm <sup>2</sup> ) | Catalyst content wrt<br>to carbon (%) | Tafel slope<br>(mV dec <sup>-1</sup> ) | Electrolyte   | Ref              |
|-----------------------------------------------------------------|--------------------------------------------|-------------------------------------------------|---------------------------------------|----------------------------------------|---------------|------------------|
| <b>Ni-based catalysts supported on graphene based materials</b> |                                            |                                                 |                                       |                                        |               |                  |
| Ni/NiO@rGO                                                      | 480@10                                     | ns                                              | 42                                    | 41                                     | 0.5M KOH      | 4                |
| RGO-NiO/Ni-300C                                                 | >570                                       | 0.24                                            | 90                                    | 147                                    | 1 M KOH       | 5                |
| RGO-NiO/Ni-500C                                                 | 530@10                                     | 0.24                                            | 90                                    | 81                                     | 1 M KOH       | 5                |
| RGO-Ni-Fe Foam -500C                                            | 480@10                                     | 0.24                                            | 48                                    | 57                                     | 1 M KOH       | 6                |
| RGO-Ni-Fe-HT                                                    | 390@10                                     | 0.24                                            | 70                                    | 75                                     | 1 M KOH       | 6                |
| CoNi/GNR                                                        | 430@10                                     | 0.15                                            | 40                                    | 131                                    | 1M KOH        | 7                |
| GNiPy350N                                                       | 320@10                                     | 0.15                                            | 30                                    | 136                                    | 1M KOH        | 8                |
| Ni <sub>0.9</sub> Fe <sub>0.1</sub> /NC (20wt.%)                | 400@10                                     | 0.2                                             | 20                                    | -                                      | 1M KOH        | 9                |
| Ni <sub>0.9</sub> Fe <sub>0.1</sub> /NC (40wt.%)                | 350@10                                     | 0.2                                             | 40                                    | -                                      | 1M KOH        | 9                |
| Ni <sub>0.9</sub> Fe <sub>0.1</sub> /NC (60wt.%)                | 330@10                                     | 0.2                                             | 60                                    | 45                                     | 1M KOH        | 9                |
| Ni <sub>0.9</sub> Fe <sub>0.1</sub> /NC (80wt.%)                | 300@10                                     | 0.2                                             | 80                                    | -                                      | 1M KOH        | 9                |
| <b>Ni/NiO/GA<sub>0.01</sub></b>                                 | <b>1150@10</b>                             | <b>0.07</b>                                     | <b>1.56</b>                           |                                        | <b>1M KOH</b> | <b>10</b>        |
| Ni/NiO/GA <sub>0.05</sub>                                       | 480@10                                     | 0.07                                            | 5.88                                  |                                        | 1M KOH        | 10               |
| Ni/NiO/GA <sub>0.1</sub>                                        | 410@10                                     | 0.07                                            | 12.0                                  | 69                                     | 1M KOH        | 10               |
| Ni/NiO/GA <sub>0.2</sub>                                        | 370@10                                     | 0.07                                            | 22.6                                  | 61                                     | 1M KOH        | 10               |
| Ni/NiO/GA <sub>0.4</sub>                                        | 320@10                                     | 0.07                                            | 40                                    |                                        | 1M KOH        | 10               |
| <b>rGO-2.5-Ni-lactates</b>                                      | <b>457@10</b>                              | <b>0.1</b>                                      | <b>2.5</b>                            | <b>122.9</b>                           | <b>1M KOH</b> | <b>This work</b> |
| <b>rGO-4.1-Ni-lactates</b>                                      | <b>432@10</b>                              | <b>0.1</b>                                      | <b>4.1</b>                            | <b>95.3</b>                            | <b>1M KOH</b> |                  |
| <b>rGO-10.3-Ni-lactates</b>                                     | <b>430@10</b>                              | <b>0.1</b>                                      | <b>10.3</b>                           | <b>105.7</b>                           | <b>1M KOH</b> |                  |
| <b>rGO-3.8-Ni-nitrates</b>                                      | <b>458@10</b>                              | <b>0.1</b>                                      | <b>3.8</b>                            | <b>115.4</b>                           | <b>1M KOH</b> |                  |
| <b>rGO-6.9-Ni-nitrates</b>                                      | <b>431@10</b>                              | <b>0.1</b>                                      | <b>6.9</b>                            | <b>98.5</b>                            | <b>1M KOH</b> |                  |
| <b>Influence of Fe on Nickel based catalysts</b>                |                                            |                                                 |                                       |                                        |               |                  |
| RuO <sub>2</sub> /NF                                            | 317@100                                    | 0.2                                             | 100                                   | 106.4                                  | 1M KOH        | 11               |
| Ru-Ni(Fe)P <sub>2</sub> /NF                                     | 251@100                                    | 0.2                                             | 100                                   | 91.6                                   | 1M KOH        | 11               |
| Ru-NiP <sub>2</sub> /NF                                         | 253@100                                    | 0.2                                             | 100                                   | 125.1                                  | 1M KOH        | 11               |
| NiFe/Fe-MoO <sub>2</sub>                                        | 213@20                                     | 8.6                                             | 52                                    | 48                                     | 1M KOH        | 12               |
| Ni/MoO <sub>2</sub>                                             | 289@20                                     | 9.7                                             | 52                                    | 135                                    | 1M KOH        | 12               |
| MoO <sub>2</sub>                                                | 340@20                                     | 6.2                                             | 100                                   | 162                                    | 1M KOH        | 12               |

Figure S5. Ni LM

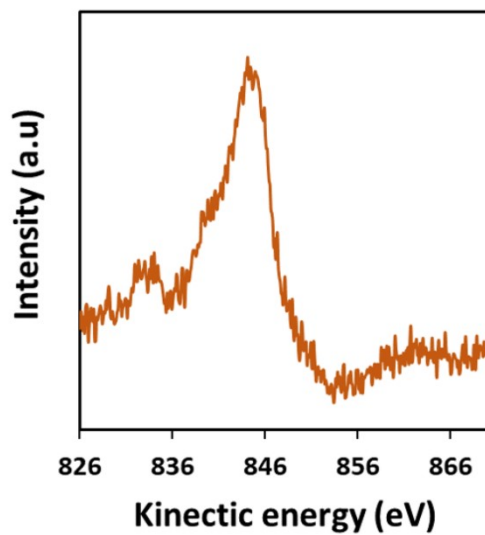

l by XPS analysis

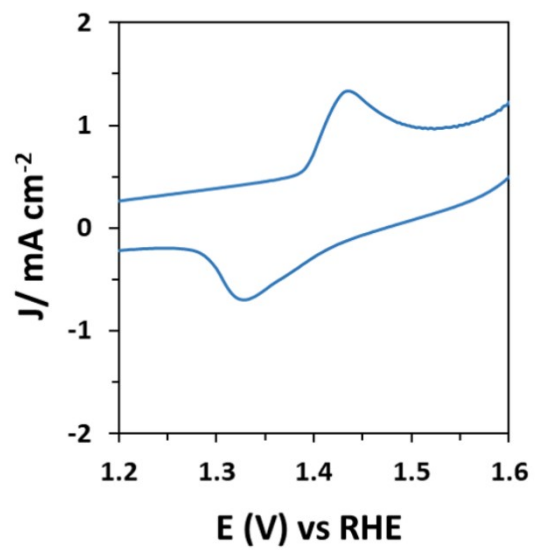

**Figure S6** | Redox peaks corresponding to the oxidation of Ni(OH)<sub>2</sub> to NiOOH (anodic peak) at 1.44V and the reverse reduction process (cathodic peak) at 1.33V

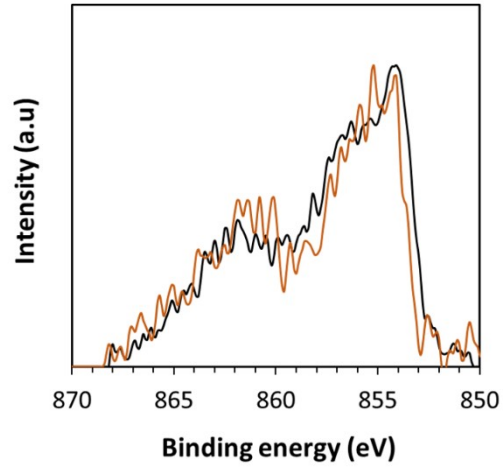

**Figure S7** | Ni 2p<sub>3/2</sub> XPS spectrum of rGO-4.1-Ni-lactate sample processed by freeze-casting (black) or tape-casting (orange)

**Table S5** | Values related to double-layer capacitance ( $C_{dl}$ ) and electrochemical surface area (ECSA) obtained from all the samples prepared in this work.  $R_{ct}$  values obtained from impedance measurements are also shown.

| Sample               | Before OER stability test |                        |                       | After CP ( $10\text{mAcm}^{-2}$ , 12h) |                        |                       |
|----------------------|---------------------------|------------------------|-----------------------|----------------------------------------|------------------------|-----------------------|
|                      | $C_{dl}$ (mF)             | ECSA ( $\text{cm}^2$ ) | $R_{ct}$ ( $\Omega$ ) | $C_{dl}$ (mF)                          | ECSA ( $\text{cm}^2$ ) | $R_{ct}$ ( $\Omega$ ) |
| rGO                  | 0.38                      | 9.50                   | 262.40                |                                        |                        |                       |
| rGO-3.8-Ni-nitrates  | 0.59                      | 14.75                  | 46.10                 |                                        |                        |                       |
| rGO-6.9-Ni-nitrates  | 1.57                      | 39.25                  | 19.67                 |                                        |                        |                       |
| rGO-2.5-Ni-lactates  | 0.59                      | 14.75                  | 68.40                 |                                        |                        |                       |
| rGO-4.1-Ni-lactates  | 0.50                      | 12.50                  | 18.07                 |                                        |                        |                       |
| rGO-10.3-Ni-lactates | 2.97                      | 74.25                  | 18.79                 | 0.38                                   | 9.50                   | 5.10                  |

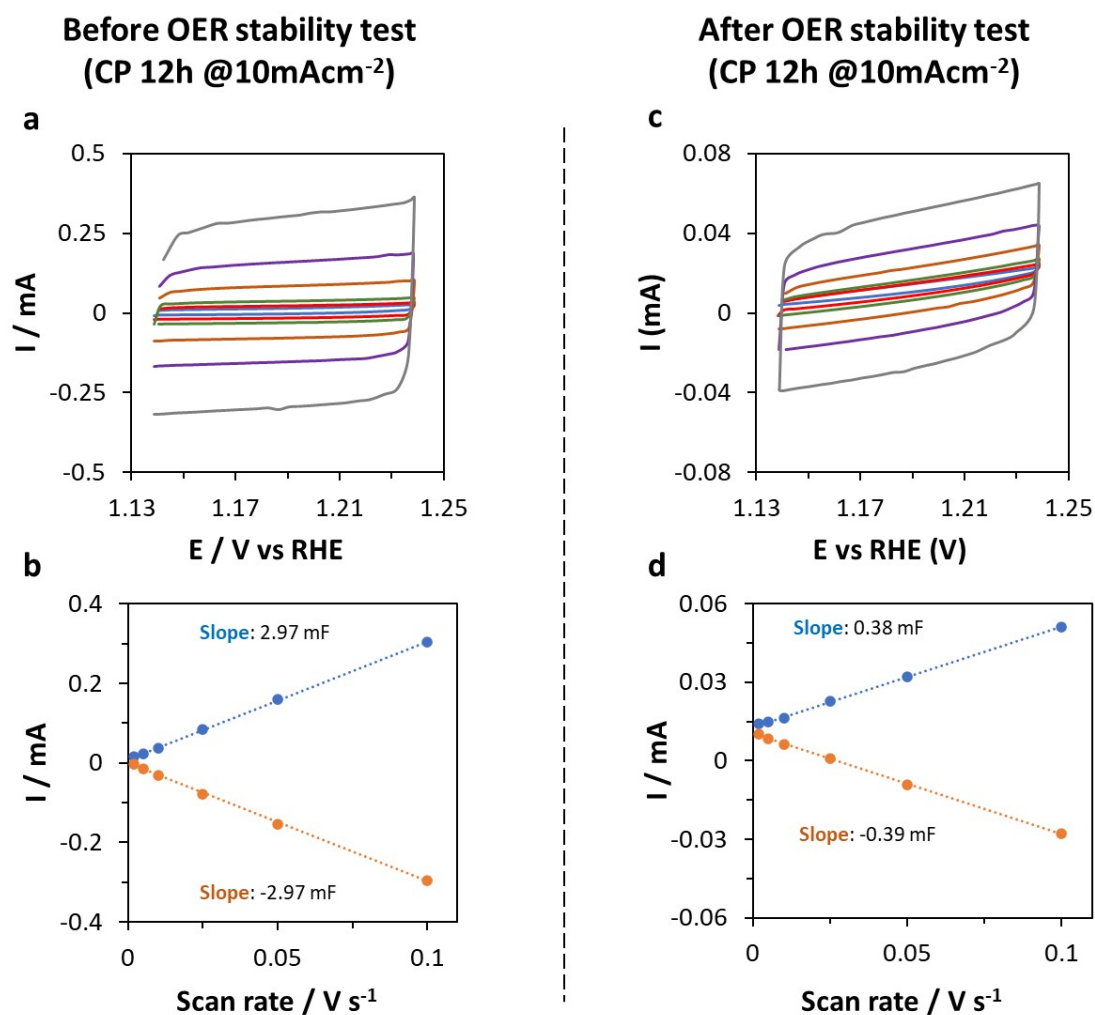

**Figure S8** | Double-layer capacitance measurements for determining electrochemically active surface area of rGO-10-Ni-lactates in 1 M KOH. (a,c) Cyclic voltammograms before and after OER stability test measured in a non-Faradaic region of the voltammogram at the following scan rate: (–) 0.002, (–) 0.005, (–) 0.010, (–) 0.025, (–) 0.05, (–) 0.1  $\text{Vs}^{-1}$ . All current is assumed to be due to capacitive charging. (b) The cathodic (•) and anodic (•) charging currents measured at 1.2 V vs. RHE were plotted as a function of scan rate. The double-layer capacitance of the system ( $C_{dl}$ ) is calculated as the average of the absolute slopes obtained from linear fits to the data. The electrochemically active surface area (ECSA) of the catalysts can be calculated by dividing  $C_{dl}$  by the specific capacitance of the sample ( $C_s$ :  $0.040 \text{ mFcm}^{-2}$  in KOH 1M) as shown in the following

equation: 
$$ECSA = \frac{C_{dl}}{C_s}$$



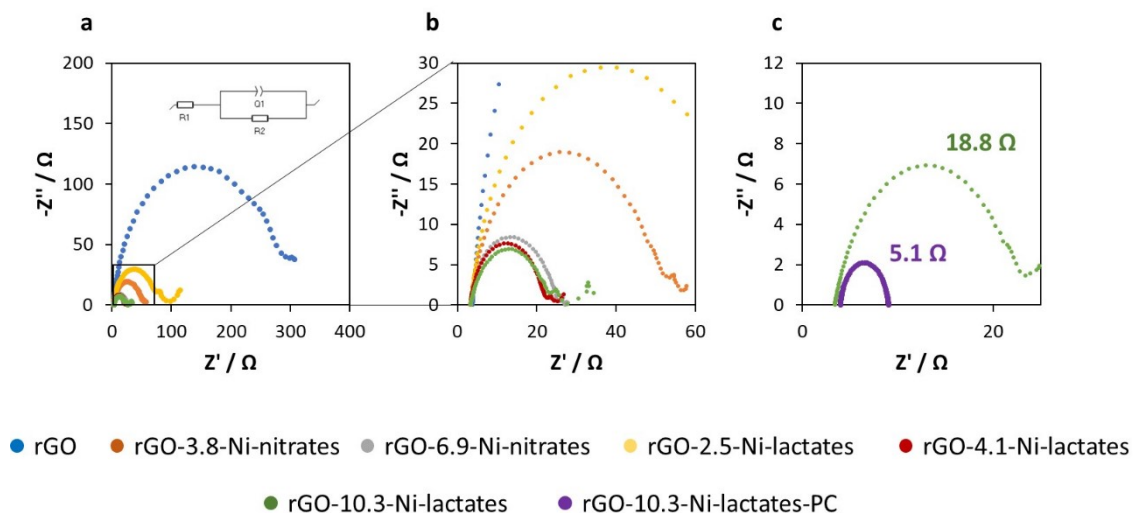

**Figure S9 | Nyquist plots** of the different samples in  $N_2$ -saturated KOH 1M before OER stability test (a,b) and change in the EIS result for rGO-10.3-Ni-lactates after CP at  $10 \text{ mAcm}^{-2}$  for 12 hours (c). The conditions of the EIS experiment were 10 mV of potential perturbation with a frequency range between 100 kHz and 100 mHz. For EIS acquisition a constant potential of 1.7 V vs RHE was applied.

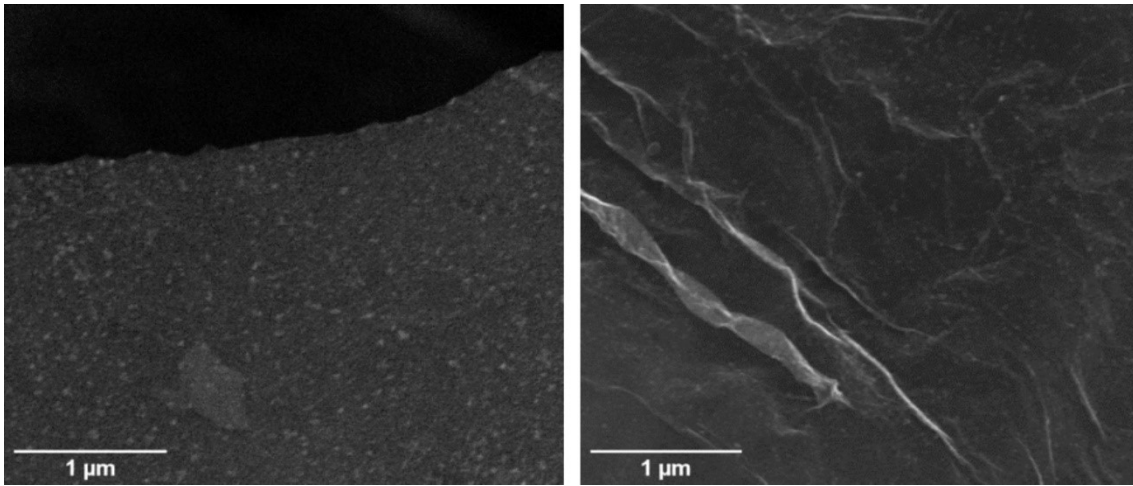

**Figure S10** | Scanning electron micrographs (SEM) of rGO-10.3-Ni-lactates aerogel taken using electro dispersive electrons.

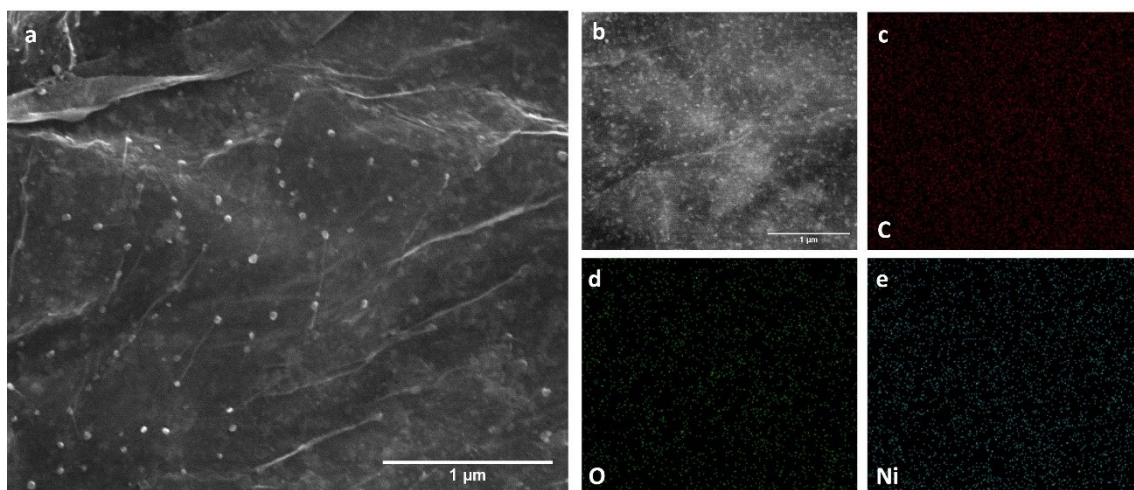

**Figure S11 | | SEM-EDS characterization.** SEM images of rGO-10.3-Ni-lactates drop-casted into a graphite disc electrode taken using electro dispersive (a) and backscattered (b) electrons. EDS mapping elements on the same spot corresponding to carbon (c), oxygen (d) and nickel (e).

**Table S6** | Selected area electron diffraction (SAED) ring patterns taken from rGO-10.3-Ni-lactates. Diameter measurements of the rings were made using the software ImageJ.

| 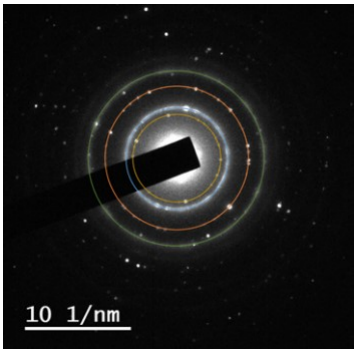 | <b>Reciprocal of diameter (1/nm)</b> | <b>Interplanar spacing (Å)</b> |                                    |
|-----------------------------------------------------------------------------------|--------------------------------------|--------------------------------|------------------------------------|
|                                                                                   |                                      | <b>Calculated</b>              | <b>Theoretical <sup>3</sup>NiO</b> |
|                                                                                   | 8.356                                | <b>2.393</b>                   | <b>2.4094</b>                      |
|                                                                                   | 9.596                                | <b>2.084</b>                   | <b>2.0845</b>                      |
|                                                                                   | 13.556                               | <b>1.475</b>                   | <b>1.4763</b>                      |
|                                                                                   | 16.571                               | <b>1.207</b>                   | <b>1.2057</b>                      |

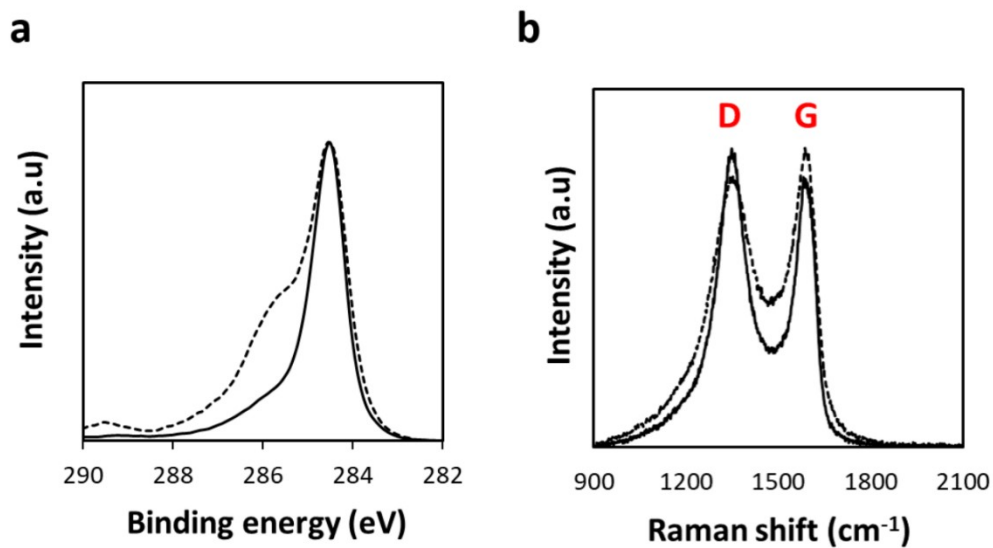

**Figure S12 | Characterization of the carbon-based material.** C1s spectra (a) and Raman profile (b) of rGO (solid line) and rGO-10.3-Ni-lactates (dashed line).

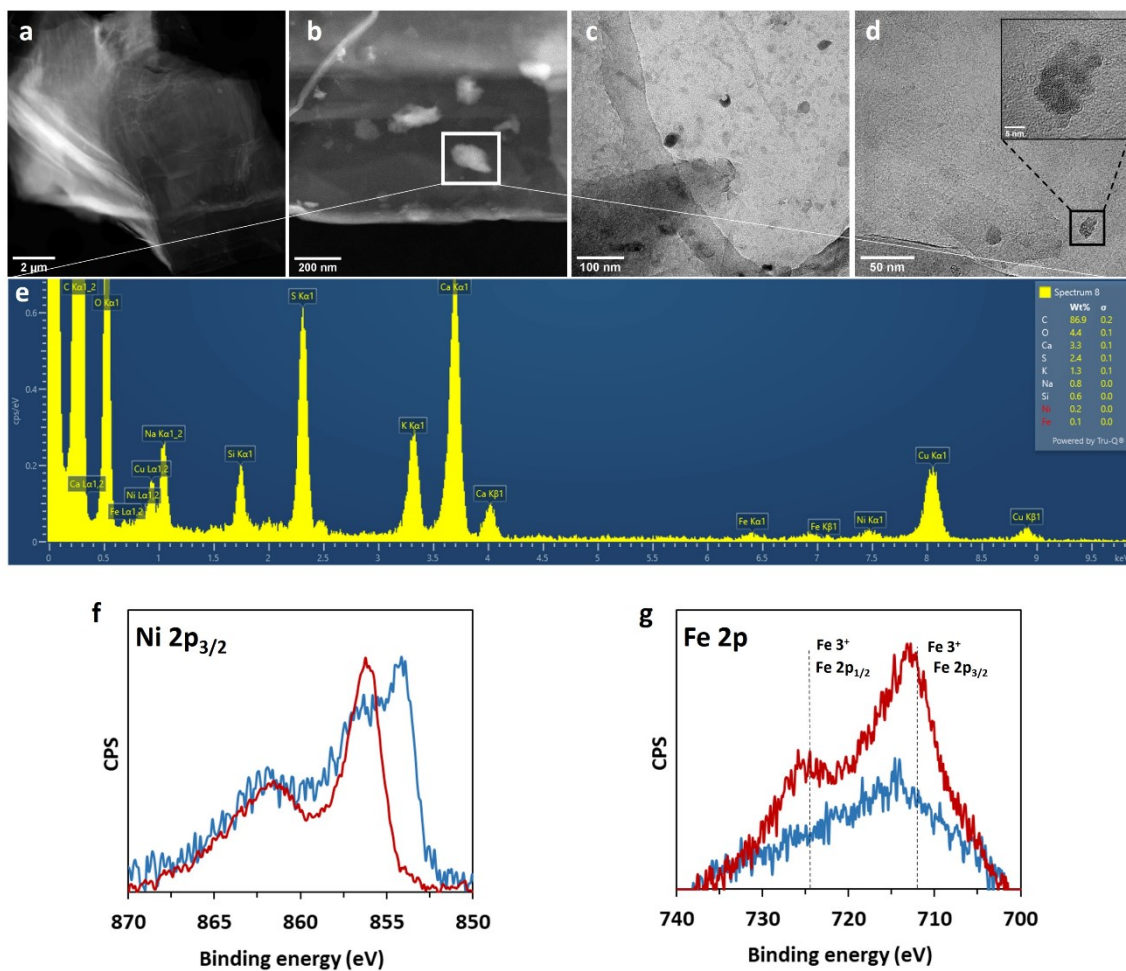

**Figure S13 | Post-catalysis characterization of rGO-4.1-Ni-lactates.** STEM (a,b) and TEM (c,d) images of the sample. The inset in d corresponds with HR-TEM of a particle. EDX analysis was also carried out (e). Spectra of Ni 2p<sub>3/2</sub> (f) and Fe 2p (g) of the sample before (blue) and after the conditioning method (CP 10 mAcm<sup>-2</sup> for 12 h) (red) were compared.

**Table S7** | Comparison of the influence of Fe impurities in different Ni-based materials reported in the literature. The comparison is made in terms of times-fold increase of the current density achieved after a conditioning method that involves the incorporation of Fe from impurities in the electrolyte.

| Sample                               | Conditioning method (CM)         | Current density (J / mAcm <sup>-2</sup> ) |          | Potential (V vs RHE) | Times-fold increase | Ref           |
|--------------------------------------|----------------------------------|-------------------------------------------|----------|----------------------|---------------------|---------------|
|                                      |                                  | Before CM                                 | After CM |                      |                     |               |
| NiO <sub>x</sub> H <sub>y</sub> film | CA 1.5 V vs RHE<br>3 h           | 8.5                                       | 17.0     | ≈2.00                | 2.0                 | <sup>13</sup> |
| Ni film                              | 1.0-1.8 V vs RHE<br>200 CV       | 2.4                                       | 8.4      | 1.53                 | 3.5                 | <sup>14</sup> |
| Ni foil                              | CP 5 mAcm <sup>-2</sup><br>24 h  | 19                                        | 42.5     | 1.63                 | 2.2                 | <sup>15</sup> |
| rGO-4.1-Ni-lactates                  | CP 10 mAcm <sup>-2</sup><br>12 h | 5                                         | 58       | 1.80 V               | 11.6                | This work     |

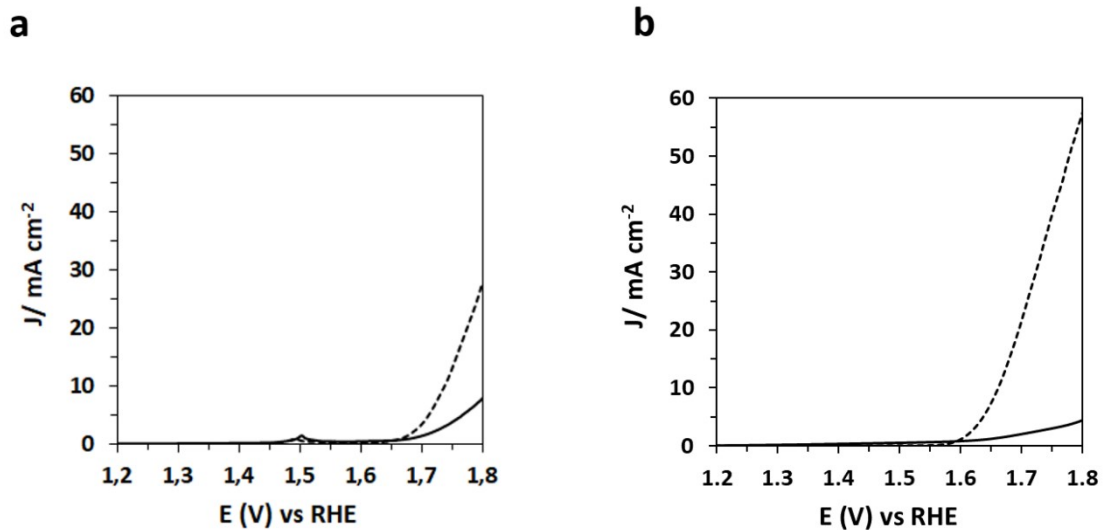

**Figure S14 | Improving in OER activity.** LSV experiments at  $1\text{mVs}^{-1}$  before (solid line) and after CP at  $10\text{mAcm}^{-2}$  during 12h (dashed line) are shown for Ni(OH)<sub>2</sub> drop-casted film (a) and rGO-4.1-Ni-lactates (b). Experiments were carried out in N<sub>2</sub>-saturated 1M KOH.



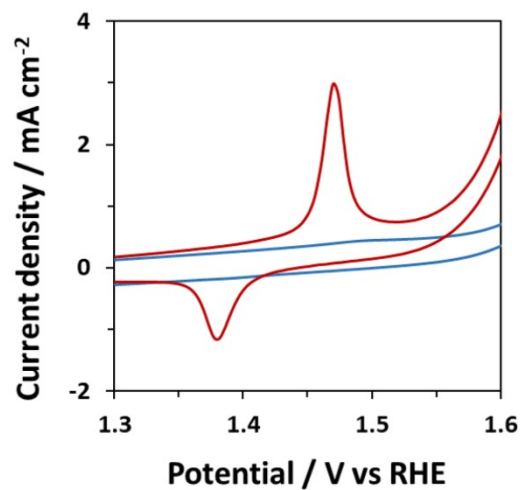

**Figure S15** | CV experiment of rGO after CP for 12 hours using KOH 1M (blue) and KOH 1M Fe-free (red)

## References

- 1 L. Trotochaud, S. L. Young, J. K. Ranney and S. W. Boettcher, *J Am Chem Soc*, 2014, **136**, 6744–6753.
- 2 L. Liu, L. P. Twilight, J. L. Fehrs, Y. Ou, D. Sun and S. W. Boettcher, *ChemElectroChem*, , DOI:10.1002/celc.202200279.
- 3 M. Niculescu and P. Budrugaec, *Revue Roumaine de Chimie*, 2013, vol. 58(4):381-386.
- 4 S. S. Narwade, S. M. Mali, R. V. Digraskar, V. S. Sapner and B. R. Sathe, *Int J Hydrogen Energy*, 2019, **44**, 27001–27009.
- 5 D. Wang, F. Watanabe and W. Zhao, *ECS Journal of Solid State Science and Technology*, 2017, **6**, M3049–M3054.
- 6 D. Wang, F. Watanabe and W. Zhao, *J Electrochem Soc*, 2016, **163**, F3158–F3163.
- 7 L. S. Bezerra and G. Maia, *J Mater Chem A Mater*, 2020, **8**, 17691–17705.
- 8 A. S. Souza, L. S. Bezerra, E. S. F. Cardoso, G. V. Fortunato and G. Maia, *J Mater Chem A Mater*, 2021, **9**, 11255–11267.
- 9 X. Zhang, H. Xu, X. Li, Y. Li, T. Yang and Y. Liang, *ACS Catal*, 2016, **6**, 580–588.
- 10 F. E. Sarac Oztuna, T. Beyazay and U. Unal, *Journal of Physical Chemistry C*, 2019, **123**, 28131–28141.
- 11 D. Wu, B. Liu, R. Li, D. Chen, W. Zeng, H. Zhao, Y. Yao, R. Qin, J. Yu, L. Chen, J. Zhang, B. Li and S. Mu, *Small*, 2023, **19**, 2300030
- 12 W. Shi, J. Zhu, L. Gong, D. Feng, Q. Ma, J. Yu, H. Tang, Y. Zhao and S. Mu, *Small*
- 13 R. Farhat, J. Dhainy and L. I. Halaoui, *ACS Catal*, 2020, **10**, 20–35.
- 14 F. Bao, E. Kemppainen, I. Dorbandt, F. Xi, R. Bors, N. Maticiu, R. Wensch, R. Bagacki, C. Schary, U. Michalczyk, P. Bogdanoff, I. Lauer mann, R. Van De Krol, R. Schlatmann and S. Calnan, *ACS Catal*, 2021, **11**, 10537–10552.
- 15 Y. J. Son, S. Kim, V. Leung, K. Kawashima, J. Noh, K. Kim, R. A. Marquez, O. A. Carrasco-Jaim, L. A. Smith, H. Celio, D. J. Milliron, B. A. Korgel and C. B. Mullins, *ACS Catal*, 2022, **12**, 10384–10399.
